# Supplementary material
Source: Springer Nature journal article supplement (https://www.springermedizin.de/resource/supplementary/12894_2009_159_MOESM5_ESM.pdf/9513086)

**Female**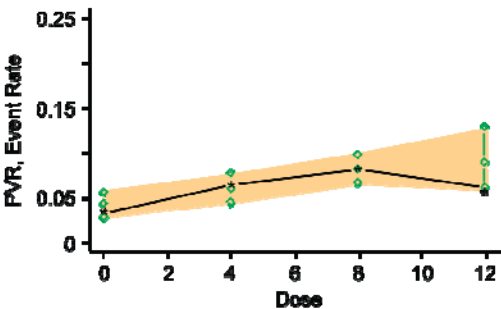**Age  $\leq 70$** **Male**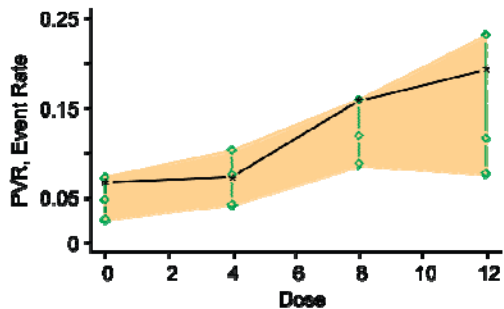**Age  $> 70$** 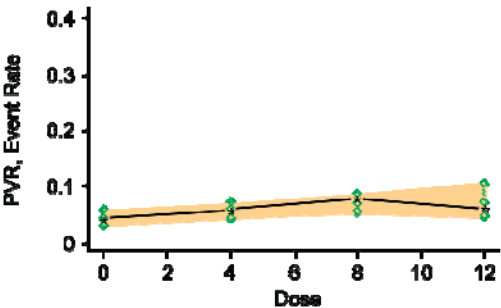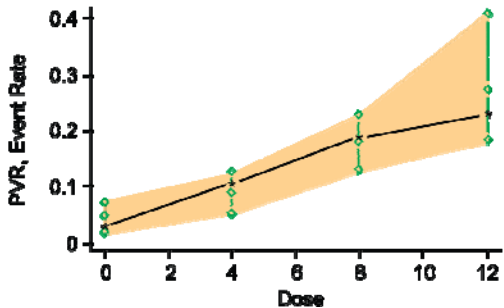

Supplement: MOESM5 [file 9513086]
